# Supplementary material for: Serological Assays for Alveolar and Cystic Echinococcosis—A Comparative Multi-Test Study in Switzerland and Kyrgyzstan
Source: MDPI journal article supplement (doi:10.3390/pathogens11050518), 2022-04-27
Supplement: s1 [file s1]

**Supplementary table S1. Swiss and Kyrgyz AE patients; overview sensitivity, specificity and cross-reactions**

| Antigens/Tests                                    |            | Sensitivity                        |                  | Specificity      |                  |                  | Cross-reactions  |                  |                  |                  |
|---------------------------------------------------|------------|------------------------------------|------------------|------------------|------------------|------------------|------------------|------------------|------------------|------------------|
| in house <sup>1</sup> and commercial <sup>2</sup> |            | Swiss                              | Kyrgyz           | Swiss            | Swiss            | Kyrgyz           | SwissCO          | KyrgyzCO         | SwissCO          | KyrgyzCO         |
|                                                   |            | AE patients                        |                  | blood donors     | NPLL             | US negative      | Parasites        |                  | CE patients      |                  |
| N=23                                              | Isolate    | N=60                               | N=40             | N=68             | N=38             | N=68             | N=144            |                  | N=64             |                  |
| EmVF* <sup>1</sup>                                | 1. J2012   | 0.96 (0.86-0.99)                   | 0.74 (0.54-0.90) | 0.99 (0.93-0.99) | 0.95 (0.82-0.99) | 0.89 (0.76-0.97) | 0.19 (0.13-0.28) | 0.11 (0.09-0.12) | 0.86 (0.75-0.93) | 0.68 (0.56-0.79) |
|                                                   | 2. AT17    | 0.95 (0.85-0.99)                   | 0.77 (0.57-0.92) | 0.98 (0.92-0.99) | 0.95 (0.82-0.99) | 0.92 (0.79-0.98) | 0.26 (0.20-0.34) | 0.19 (0.13-0.26) | 0.88 (0.77-0.94) | 0.74 (0.61-0.84) |
| EmVC* <sup>1</sup>                                | 1. J2012   | 0.95 (0.85-0.99)                   | 0.82 (0.63-0.95) | 0.99 (0.94-0.99) | 0.97 (0.86-0.99) | 0.91 (0.79-0.98) | 0.19 (0.13-0.26) | 0.15 (0.10-0.17) | 0.67 (0.54-0.78) | 0.64 (0.51-0.76) |
|                                                   | 2. AT17    | 0.96 (0.86-0.99)                   | 0.79 (0.59-0.93) | 0.99 (0.94-0.99) | 0.97 (0.86-0.99) | 0.91 (0.79-0.98) | 0.26 (0.18-0.34) | 0.18 (0.13-0.26) | 0.81 (0.70-0.90) | 0.70 (0.58-0.81) |
| EmP* <sup>1</sup>                                 | 1. J2012   | 0.96 (0.88-0.99)                   | 0.82 (0.63-0.95) | 0.98 (0.93-0.99) | 0.95 (0.82-0.99) | 0.95 (0.86-0.99) | 0.08 (0.04-0.14) | 0.10 (0.05-0.15) | 0.59 (0.46-0.70) | 0.61 (0.53-0.71) |
|                                                   | 2. AT17    | 0.95 (0.85-0.99)                   | 0.79 (0.59-0.93) | 0.98 (0.92-0.99) | 0.95 (0.82-0.99) | 0.94 (0.83-0.99) | 0.06 (0.03-0.11) | 0.08 (0.04-0.14) | 0.56 (0.43-0.69) | 0.58 (0.45-0.70) |
| Em2G11* <sup>1</sup>                              | 1. J2012   | 0.91 (0.80-0.98)                   | 0.80 (0.62-0.94) | 0.97 (0.88-0.99) | 1.00 (0.91-1.00) | 0.88 (0.76-0.97) | 0.29 (0.22-0.37) | 0.38 (0.23-0.43) | 0.53 (0.40-0.66) | 0.56 (0.43-0.69) |
|                                                   | 2. AT17    | 0.91 (0.78-0.98)                   | 0.78 (0.56-0.91) | 0.96 (0.88-0.99) | 1.00 (0.91-1.00) | 0.87 (0.75-0.96) | 0.29 (0.22-0.37) | 0.38 (0.23-0.43) | 0.53 (0.40-0.66) | 0.55 (0.42-0.67) |
| mAb EmG3-EmVC* <sup>1</sup>                       | 1. J2012   | 0.96 (0.87-0.99)                   | 0.78 (0.59-0.93) | 0.98 (0.91-0.99) | 0.97 (0.86-0.99) | 0.91 (0.79-0.98) | 0.17 (0.11-0.24) | 0.19 (0.13-0.26) | 0.66 (0.53-0.77) | 0.69 (0.56-0.80) |
|                                                   | 2. AT17    | 0.94 (0.83-0.99)                   | 0.75 (0.54-0.91) | 0.97 (0.90-0.99) | 0.92 (0.79-0.98) | 0.89 (0.77-0.97) | 0.11 (0.06-0.17) | 0.11 (0.06-0.17) | 0.72 (0.59-0.82) | 0.72 (0.59-0.82) |
| recEm18 <sup>1</sup>                              |            | 0.82 (0.67-0.94)                   | 0.70 (0.48-0.86) | 0.96 (0.87-0.99) | 0.95 (0.82-0.99) | 0.89 (0.76-0.97) | 0.06 (0.03-0.12) | 0.06 (0.03-0.12) | 0.13 (0.06-0.23) | 0.13 (0.06-0.23) |
| recEm95 <sup>1</sup>                              |            | 0.67 (0.50-0.82)                   | 0.82 (0.64-0.95) | 0.91 (0.79-0.98) | 0.92 (0.79-0.98) | 0.95 (0.86-0.99) | 0.28 (0.22-0.37) | 0.52 (0.44-0.60) | 0.14 (0.07-0.25) | 0.25 (0.15-0.37) |
| mAb EmG3-EgVC <sup>1</sup>                        |            | 0.78 (0.58-0.92)                   | 0.78 (0.58-0.92) | 0.83 (0.69-0.93) | 0.86 (0.72-0.96) | 0.83 (0.69-0.93) | 0.22 (0.14-0.27) | 0.22 (0.16-0.30) | 0.66 (0.53-0.77) | 0.66 (0.53-0.77) |
| EgVC <sup>1</sup>                                 |            | 0.75 (0.59-0.88)                   | 0.73 (0.53-0.89) | 0.83 (0.69-0.93) | 0.92 (0.79-0.98) | 0.67 (0.50-0.81) | 0.19 (0.13-0.26) | 0.22 (0.16-0.30) | 0.53 (0.40-0.66) | 0.41 (0.29-0.54) |
| EgCF <sup>1</sup>                                 |            | 0.95 (0.85-0.99)                   | 0.76 (0.55-0.91) | 0.99 (0.93-0.99) | 0.97 (0.86-0.99) | 0.88 (0.75-0.96) | 0.38 (0.30-0.47) | 0.29 (0.22-0.37) | 0.86 (0.75-0.93) | 0.73 (0.61-0.84) |
| EgP <sup>1</sup>                                  |            | 0.96 (0.87-0.99)                   | 0.77 (0.57-0.92) | 0.99 (0.93-0.99) | 0.95 (0.82-0.99) | 0.92 (0.81-0.98) | 0.26 (0.18-0.29) | 0.16 (0.11-0.24) | 0.83 (0.71-0.91) | 0.83 (0.71-0.91) |
| EgAgB <sup>1</sup>                                |            | 0.89 (0.75-0.97)                   | 0.70 (0.50-0.88) | 0.98 (0.91-0.99) | 0.95 (0.82-0.99) | 0.81 (0.67-0.92) | 0.35 (0.28-0.44) | 0.40 (0.31-0.47) | 0.83 (0.71-0.91) | 0.84 (0.73-0.92) |
| recEg2B2 <sup>1</sup>                             |            | 0.64 (0.47-0.80)                   | 0.65 (0.44-0.83) | 0.64 (0.47-0.79) | 0.84 (0.69-0.94) | 0.65 (0.49-0.79) | 0.41 (0.35-0.51) | 0.40 (0.35-0.51) | 0.58 (0.45-0.64) | 0.84 (0.73-0.92) |
| Westernblot-genus <sup>2</sup>                    | EUROIMM UN | 0.93 (0.84-0.97)                   | 0.65 (0.50-0.78) | n/d              | 0.97 (0.86-0.99) | n/d              | 0.10 (0.06-0.14) | 0.10 (0.06-0.14) | 0.83 (0.71-0.91) | 0.65 (0.53-0.76) |
| Westernblot-species <sup>2</sup>                  | EUROIMM UN | 0.58 (0.46-0.70)                   | 0.45 (0.31-0.60) | n/d              | 0.97 (0.86-0.99) | n/d              | 0.11 (0.07-0.15) | 0.11 (0.07-0.15) | 0.56 (0.43-0.69) | 0.48 (0.37-0.60) |
| EmVF-ELISA <sup>2</sup>                           | EUROIMM UN | 0.88 (0.78-0.94)                   | 0.55 (0.40-0.69) | n/d              | 1.00 (0.91-1.00) | n/d              | 0.18 (0.12-0.25) | 0.18 (0.12-0.25) | 0.78 (0.67-0.87) | 0.52 (0.40-0.63) |
| EgP-IFAT <sup>2</sup>                             | EUROIMM UN | 0.90 (0.80-0.95)                   | 0.68 (0.52-0.80) | n/d              | 0.97 (0.86-0.99) | n/d              | 0.28 (0.18-0.35) | 0.28 (0.18-0.35) | 0.83 (0.71-0.91) | 0.74 (0.62-0.83) |
| VectorBest-ELISA <sup>2</sup>                     | VectorBest | 0.77 (0.65-0.86)                   | 0.45 (0.31-0.60) | n/d              | 1.00 (0.91-1.00) | n/d              | 0.16 (0.11-0.23) | 0.16 (0.11-0.23) | 0.63 (0.50-0.73) | 0.35 (0.24-0.47) |
| *1. European and 2. Kyrgyz isolate                |            | NPLL = non parasitic liver lesions |                  |                  |                  |                  | CO = Cut-Off     |                  | CO = Cut-Off     |                  |

**Supplementary table S2. Swiss and Kyrgyz CE patients; overview sensitivity, specificity and cross-reactions**

| Antigens/Tests                                    |            | Sensitivity          |                  | Specificity           |                  |                       | Cross-reactions      |                  |                        |                  |
|---------------------------------------------------|------------|----------------------|------------------|-----------------------|------------------|-----------------------|----------------------|------------------|------------------------|------------------|
| in house <sup>1</sup> and commercial <sup>2</sup> |            | Swiss<br>CE patients | Kyrgyz           | Swiss<br>blood donors | Swiss<br>NPLL    | Kyrgyz<br>US negative | SwissCO<br>Parasites | KyrgyzCO         | SwissCO<br>AE patients | KyrgyzCO         |
| N=19                                              | Isolate    | N=41                 | N=23             | N=68                  | N=38             | N=68                  | N=144                |                  | N=100                  |                  |
| EmVF* <sup>1</sup>                                | 1. J2012   | 0.94 (0.80-0.99)     | 0.70 (0.42-0.90) | 0.97 (0.89-0.99)      | 0.95 (0.82-0.99) | 0.85 (0.72-0.94)      | 0.34 (0.26-0.42)     | 0.14 (0.09-0.21) | 0.87 (0.79-0.93)       | 0.76 (0.66-0.84) |
|                                                   | 2. AT17    | 0.91 (0.76-0.99)     | 0.76 (0.49-0.93) | 0.95 (0.86-0.99)      | 0.95 (0.82-0.99) | 0.85 (0.72-0.95)      | 0.40 (0.32-0.48)     | 0.29 (0.20-0.34) | 0.79 (0.88-0.94)       | 0.81 (0.72-0.88) |
| EmVC* <sup>1</sup>                                | 1. J2012   | 0.81 (0.63-0.95)     | 0.66 (0.38-0.89) | 0.89 (0.98-0.99)      | 0.95 (0.82-0.99) | 0.86 (0.73-0.95)      | 0.35 (0.28-0.44)     | 0.28 (0.21-0.36) | 0.92 (0.85-0.96)       | 0.90 (0.82-0.95) |
|                                                   | 2. AT17    | 0.89 (0.75-0.98)     | 0.70 (0.42-0.91) | 0.97 (0.90-0.99)      | 0.97 (0.86-0.99) | 0.86 (0.73-0.96)      | 0.33 (0.26-0.42)     | 0.22 (0.16-0.30) | 0.90 (0.82-0.95)       | 0.86 (0.78-0.92) |
| EmP* <sup>1</sup>                                 | 1. J2012   | 0.84 (0.67-0.96)     | 0.76 (0.50-0.94) | 0.96 (0.88-0.99)      | 0.92 (0.79-0.98) | 0.94 (0.84-0.99)      | 0.26 (0.19-0.34)     | 0.26 (0.19-0.34) | 0.83 (0.74-0.90)       | 0.83 (0.74-0.90) |
|                                                   | 2. AT17    | 0.78 (0.59-0.93)     | 0.69 (0.41-0.89) | 0.94 (0.84-0.99)      | 0.95 (0.82-0.99) | 0.89 (0.75-0.96)      | 0.17 (0.11-0.24)     | 0.17 (0.11-0.24) | 0.84 (0.75-0.91)       | 0.84 (0.75-0.91) |
| mAb EmG3-EmVC* <sup>1</sup>                       | 1. J2012   | 0.84 (0.65-0.96)     | 0.67 (0.40-0.90) | 0.93 (0.82-0.99)      | 0.97 (0.86-0.99) | 0.88 (0.76-0.96)      | 0.23 (0.18-0.37)     | 0.29 (0.20-0.34) | 0.88 (0.80-0.94)       | 0.86 (0.78-0.92) |
|                                                   | 2. AT17    | 0.81 (0.62-0.94)     | 0.71 (0.44-0.91) | 0.94 (0.84-0.99)      | 0.84 (0.69-0.94) | 0.86 (0.73-0.95)      | 0.17 (0.11-0.24)     | 0.14 (0.09-0.21) | 0.84 (0.75-0.91)       | 0.84 (0.75-0.91) |
| mAb EmG3-EgVC <sup>1</sup>                        |            | 0.82 (0.63-0.95)     | 0.67 (0.40-0.89) | 0.90 (0.78-0.95)      | 0.82 (0.66-0.92) | 0.78 (0.63-0.90)      | 0.31 (0.24-0.39)     | 0.27 (0.20-0.35) | 0.85 (0.76-0.91)       | 0.83 (0.74-0.90) |
| EgVC <sup>1</sup>                                 |            | 0.61 (0.40-0.80)     | 0.42 (0.17-0.69) | 0.76 (0.61-0.89)      | 0.84 (0.69-0.94) | 0.80 (0.66-0.91)      | 0.33 (0.21-0.36)     | 0.12 (0.07-0.16) | 0.79 (0.70-0.87)       | 0.57 (0.47-0.67) |
| EgCF <sup>1</sup>                                 |            | 0.93 (0.79-0.99)     | 0.68 (0.40-0.90) | 0.97 (0.90-0.99)      | 0.97 (0.86-0.99) | 0.88 (0.75-0.96)      | 0.43 (0.35-0.55)     | 0.29 (0.20-0.34) | 0.91 (0.84-0.96)       | 0.81 (0.72-0.88) |
| EgP <sup>1</sup>                                  |            | 0.93 (0.80-0.99)     | 0.76 (0.50-0.94) | 0.97 (0.89-0.99)      | 0.92 (0.79-0.98) | 0.93 (0.82-0.99)      | 0.32 (0.24-0.40)     | 0.17 (0.10-0.23) | 0.86 (0.78-0.92)       | 0.78 (0.69-0.86) |
| EgAgB <sup>1</sup>                                |            | 0.86 (0.69-0.97)     | 0.68 (0.42-0.90) | 0.96 (0.86-0.99)      | 0.92 (0.79-0.98) | 0.92 (0.79-0.98)      | 0.39 (0.32-0.48)     | 0.34 (0.26-0.42) | 0.79 (0.70-0.87)       | 0.73 (0.63-0.81) |
| recEg2B2 <sup>1</sup>                             |            | 0.49 (0.29-0.70)     | 0.45 (0.19-0.72) | 0.84 (0.71-0.95)      | 0.92 (0.79-0.98) | 0.86 (0.73-0.95)      | 0.08 (0.04-0.14)     | 0.08 (0.04-0.14) | 0.33 (0.24-0.43)       | 0.33 (0.24-0.43) |
| Westernblot-genus <sup>2</sup>                    | EUROIMMUN  | 0.83 (0.71-0.91)     | 0.65 (0.53-0.76) | n/d                   | 0.97 (0.86-0.99) | n/d                   | 0.10 (0.06-0.14)     | 0.10 (0.06-0.14) | 0.93 (0.84-0.97)       | 0.65 (0.50-0.78) |
| Westernblot-species <sup>2</sup>                  | EUROIMMUN  | 0.56 (0.43-0.69)     | 0.48 (0.37-0.60) | n/d                   | 0.97 (0.86-0.99) | n/d                   | 0.11 (0.07-0.15)     | 0.11 (0.07-0.15) | 0.58 (0.46-0.70)       | 0.45 (0.31-0.60) |
| EmVF-ELISA <sup>2</sup>                           | EUROIMMUN  | 0.78 (0.67-0.87)     | 0.52 (0.40-0.63) | n/d                   | 1.00 (0.91-1.00) | n/d                   | 0.18 (0.12-0.25)     | 0.18 (0.12-0.25) | 0.88 (0.78-0.94)       | 0.55 (0.40-0.69) |
| EgP-IFAT <sup>2</sup>                             | EUROIMMUN  | 0.83 (0.71-0.91)     | 0.74 (0.62-0.83) | n/d                   | 0.97 (0.86-0.99) | n/d                   | 0.28 (0.18-0.35)     | 0.28 (0.18-0.35) | 0.90 (0.80-0.95)       | 0.68 (0.52-0.80) |
| VectorBest-ELISA <sup>2</sup>                     | VectorBest | 0.63 (0.50-0.73)     | 0.35 (0.24-0.47) | n/d                   | 1.00 (0.91-1.00) | n/d                   | 0.16 (0.11-0.23)     | 0.16 (0.11-0.23) | 0.77 (0.65-0.86)       | 0.45 (0.31-0.60) |

\*1. European and 2. Kyrgyz isolate

NPLL = non parasitic liver lesions

CO = Cut-Off

CO = Cut-Off
